# Supplementary material for: In Vitro Activity of a Novel Siderophore-Cephalosporin LCB10-0200 (GT-1), and LCB10-0200/Avibactam, against Carbapenem-Resistant Escherichia coli, Klebsiella pneumoniae, Acinetobacter baumannii, and Pseudomonas aeruginosa Strains at a Tertiary Hospital in Korea
Source: MDPI journal article supplement (doi:10.3390/ph14040370), 2021-04-16
Supplement: s1 [file s1]

Table S1. GenBank Accession numbers and the sequencing sites for all the tested strains

| Species              | Strains           | Accession numbers | Sample numbers | Sequencing sites |
|----------------------|-------------------|-------------------|----------------|------------------|
| <i>E. coli</i>       | YMC2016/11/B9214  | WAJH00000000      | SAMN12855557   | KRIBB            |
|                      | YMC2016/01/N335   | WAIH00000000      | SAMN12854952   | KRIBB            |
|                      | YMC2017/07/N50    | WAJC00000000      | SAMN12855525   | KRIBB            |
|                      | YMC2016/02/U1671  | WAIK00000000      | SAMN12854957   | KRIBB            |
|                      | YMC2016/10/P14    | WAJO00000000      | SAMN12856460   | KRIBB            |
|                      | YMC2016/09/N502   | WAJL00000000      | SAMN12856441   | KRIBB            |
|                      | YMC2018/03/U398   | WAIR00000000      | SAMN12854981   | KRIBB            |
|                      | YMC2016/06/N177   | WAJF00000000      | SAMN12855554   | KRIBB            |
|                      | YMC2017/06/N207   | WAJB00000000      | SAMN12855383   | KRIBB            |
|                      | YMC2013/01/U1489  | WAAA00000000      | SAMN12826519   | KRIBB            |
|                      | YMC2015/11/N11    | WAJK00000000      | SAMN12856440   | KRIBB            |
|                      | YMC2017/11/U3786  | WAJN00000000      | SAMN12856459   | KRIBB            |
|                      | YMC2018/03/C1211  | WAIY00000000      | SAMN12855204   | KRIBB            |
|                      | YMC2019/01/N149   | JAEEGD00000000    | SAMN16992981   | LAS              |
|                      | YMC2017/02/MS631  | SBHK00000000      | SAMN10715997   | KRIBB            |
| <i>K. pneumoniae</i> | YMC2017/12/R4462  | RWYB00000000      | SAMN10523669   | JCVI             |
|                      | YMC2017/07/P407   | SGUK00000000      | SAMN10908546   | LAS              |
|                      | YMC2017/09/C1287  | RWYP00000000      | SAMN10523658   | JCVI             |
|                      | YMC2017/12/C1072  | RWYC00000000      | SAMN10523670   | JCVI             |
|                      | YMC2017/12/R2228  | RWXX00000000      | SAMN10523665   | JCVI             |
|                      | YMC2018/09/B10953 | SGUO00000000      | SAMN10908814   | LAS              |
|                      | YMC2017/10/U3487  | RWWI00000000      | SAMN10523653   | JCVI             |
|                      | YMC2017/11/R2476  | RWYF00000000      | SAMN10523673   | JCVI             |
|                      | YMC2017/09/B12393 | RWYO00000000      | SAMN10523657   | JCVI             |
|                      | YMC2017/10/C794   | RWWH00000000      | SAMN10523652   | JCVI             |
|                      | YMC2017/11/U508   | RWWF00000000      | SAMN10523649   | JCVI             |
|                      | YMC2017/11/R1876  | RWWE00000000      | SAMN10523648   | JCVI             |
|                      | YMC2017/11/R2589  | RWWD00000000      | SAMN10523647   | JCVI             |
|                      | YMC2017/11/R3916  | RWWC00000000      | SAMN10523646   | JCVI             |
|                      | YMC2017/12/R1651  | RWYA00000000      | SAMN10523668   | JCVI             |
|                      | YMC2017/12/R337   | RWXZ00000000      | SAMN10523667   | JCVI             |
|                      | YMC2017/12/B1305  | RWXY00000000      | SAMN10523666   | JCVI             |
|                      | YMC2017/12/B2595  | RWXT00000000      | SAMN10523661   | JCVI             |
|                      | YMC2017/10/R1014  | RWYN00000000      | SAMN10523656   | JCVI             |
|                      | YMC2017/12/P169   | RWWA00000000      | SAMN10523644   | JCVI             |
|                      | YMC2017/12/U2812  | RWXV00000000      | SAMN10523663   | JCVI             |
|                      | YMC2017/12/B5771  | RWXU00000000      | SAMN10523662   | JCVI             |
|                      | YMC2017/12/P686   | RWXS00000000      | SAMN10523660   | JCVI             |
|                      | YMC2016/02/N279   | SGUT00000000      | SAMN10908872   | LAS              |
|                      | YMC2017/12/R3972  | RWYQ00000000      | SAMN10523659   | JCVI             |
|                      | YMC2017/12/P781   | RWYE00000000      | SAMN10523672   | JCVI             |
|                      | YMC2016/08/N460   | SGUL00000000      | SAMN10908808   | LAS              |
|                      | YMC2017/03/R348   | RWXH00000000      | SAMN10523624   | JCVI             |
|                      | YMC2017/01/B12075 | RWVV00000000      | SAMN10523639   | JCVI             |
|                      | YMC2017/02/B87    | RWVU00000000      | SAMN10523638   | JCVI             |
|                      | YMC2017/02/B4520  | RWVQ00000000      | SAMN10523634   | JCVI             |

|                      |                   |               |              |      |
|----------------------|-------------------|---------------|--------------|------|
| <i>A. baumannii</i>  | YMC2017/02/B4039  | RWXI00000000  | SAMN10523625 | JCVI |
|                      | YMC2017/02/R4043  | RWXG00000000  | SAMN10523623 | JCVI |
|                      | YMC2017/03/B664   | RWVR00000000  | SAMN10523635 | JCVI |
|                      | YMC2017/03/B5000  | RWXJ00000000  | SAMN10523626 | JCVI |
|                      | YMC2017/03/R3279  | RWVN00000000  | SAMN10523631 | JCVI |
|                      | YMC2017/04/R488   | RWXE00000000  | SAMN10523621 | JCVI |
|                      | YMC2017/04/R640   | RWVO00000000  | SAMN10523632 | JCVI |
|                      | YMC2017/05/B13743 | RWXL00000000  | SAMN10523628 | JCVI |
|                      | YMC2017/06/B7857  | RWXK00000000  | SAMN10523627 | JCVI |
|                      | YMC2017/06/B8443  | RWVS00000000  | SAMN10523636 | JCVI |
|                      | YMC2017/06/B10945 | RWVP00000000  | SAMN10523633 | JCVI |
|                      | YMC2017/07/B1155  | RWVM00000000  | SAMN10523630 | JCVI |
|                      | YMC2014/07/R649   | RWXF00000000  | SAMN10523622 | JCVI |
|                      | YMC2017/07/R832   | RWXC00000000  | SAMN10523619 | JCVI |
|                      | YMC2017/07/R2000  | RWXD00000000  | SAMN10523620 | JCVI |
|                      | YMC2017/07/R1800  | RWVZ00000000  | SAMN10523643 | JCVI |
|                      | YMC2017/10/B943   | RWVT00000000  | SAMN10523637 | JCVI |
|                      | YMC2016/11/B8245  | RWVY00000000  | SAMN10523642 | JCVI |
|                      | YMC2016/11/B12450 | RWVW00000000  | SAMN10523640 | JCVI |
|                      | YMC2017/07/R17    | RWVL00000000  | SAMN10523629 | JCVI |
|                      | YMC2016/11/B9337  | RWVX00000000  | SAMN10523641 | JCVI |
| <i>P. aeruginosa</i> | YMC2017/08/R997   | RWWN00000000  | SAMN10523603 | JCVI |
|                      | YMC2017/08/R2483  | RWXP00000000  | SAMN10523596 | JCVI |
|                      | YMC2017/08/R4730  | RWWK00000000  | SAMN10523600 | JCVI |
|                      | YMC2017/08/R4164  | RWWQ00000000  | SAMN10523606 | JCVI |
|                      | YMC2017/07/R3870  | RWWO00000000  | SAMN10523604 | JCVI |
|                      | YMC2017/08/R4656  | RWXM00000000  | SAMN10523592 | JCVI |
|                      | YMC2017/08/R4537  | RWWR00000000  | SAMN10523607 | JCVI |
|                      | YMC2017/12/B1486  | RWWV00000000  | SAMN10523611 | JCVI |
|                      | YMC2017/08/R2637  | RWXN00000000  | SAMN10523593 | JCVI |
|                      | YMC2017/08/R3839  | RWXQ00000000  | SAMN10523597 | JCVI |
|                      | YMC2017/08/R4671  | RWWL00000000  | SAMN10523601 | JCVI |
|                      | YMC2017/08/R4369  | RW XO00000000 | SAMN10523594 | JCVI |
|                      | YMC2017/08/R4244  | RWWX00000000  | SAMN10523613 | JCVI |
|                      | YMC2017/08/R4393  | RWWS00000000  | SAMN10523608 | JCVI |
|                      | YMC2017/08/R4643  | RWWZ00000000  | SAMN10523615 | JCVI |
|                      | YMC2017/08/R4722  | RWWT00000000  | SAMN10523609 | JCVI |
|                      | YMC2017/09/R486   | RWWU00000000  | SAMN10523610 | JCVI |
|                      | YMC2017/08/R3890  | RWXR00000000  | SAMN10523598 | JCVI |
|                      | YMC2017/08/R4261  | RWWY00000000  | SAMN10523614 | JCVI |
|                      | YMC2017/08/B13455 | RWXA00000000  | SAMN10523616 | JCVI |
|                      | YMC2017/09/R3207  | RWXB00000000  | SAMN10523617 | JCVI |
|                      | YMC2017/09/B348   | RWWW00000000  | SAMN10523612 | JCVI |
|                      | YMC2017/08/U4581  | RXFP00000000  | SAMN10523618 | JCVI |
|                      | YMC2017/08/U1849  | RWWP00000000  | SAMN10523605 | JCVI |
|                      | YMC2017/08/U3484  | RWWM00000000  | SAMN10523602 | JCVI |
|                      | YMC2017/06/R4480  | RWWJ00000000  | SAMN10523599 | JCVI |
